# Supplementary material for: Energy Transfer and Fabry-Perot Oscillation: A New Paradigm for Electrically Driven Laser in Quasi-2D Ruddlesden-Popper Perovskite Microplates Film
Source: Research Square preprint supplement (doi:10.21203/rs.3.rs-1121122/v1), 2021-12-13
Supplement: Supplementary file 1 [file db0b9ed395133b84bd72a894.docx]

**Selective Resonance Energy Transfer and Fabry-Perot Oscillation: A New Paradigm for Electrically Driven Laser in Quasi-2D Ruddlesden-Popper Perovskite Microplates Film**

**
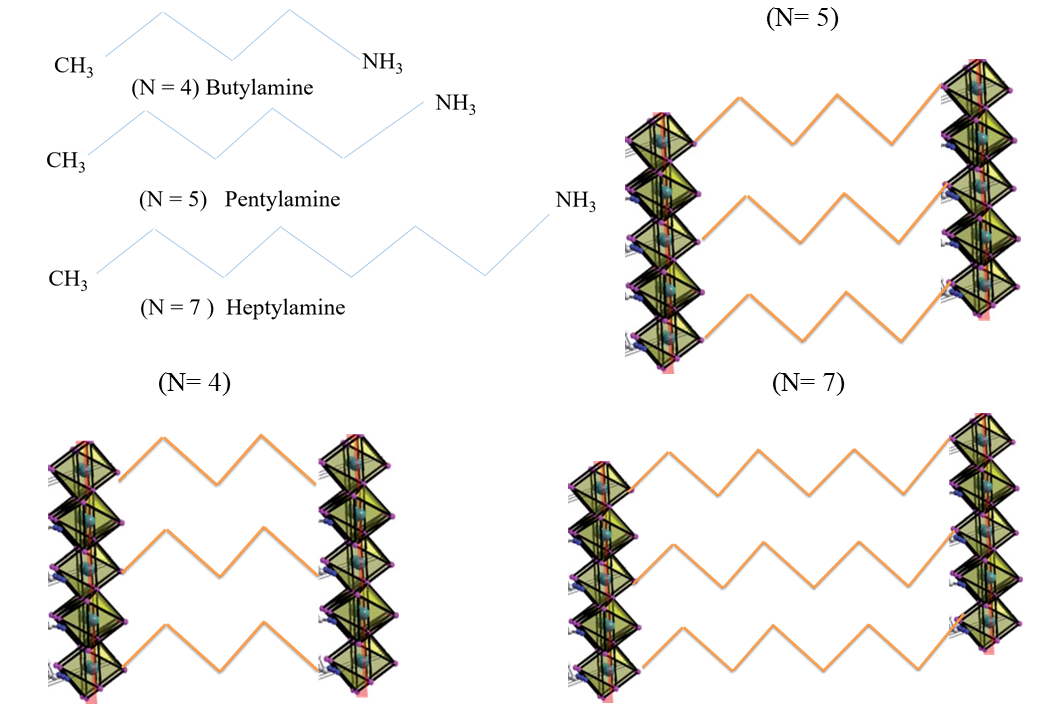
Perovskite Structure**

**Figure S1.** Schematic of different organic chains connecting the perovskite octahedron.

**Contact Angle Measurement**
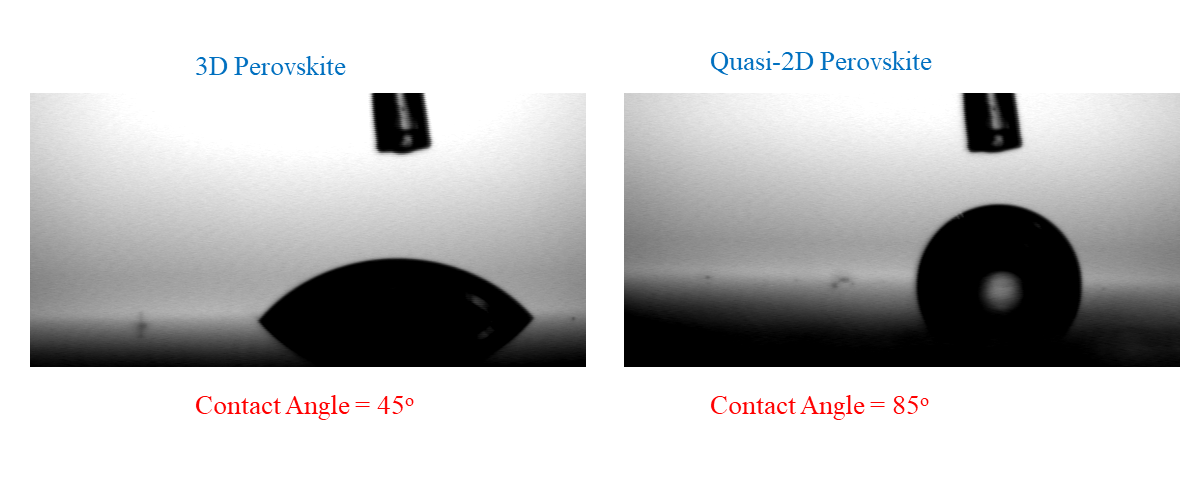


**Figure S2.** Contact angle of 3D perovskite and our synthesized quasi-2D perovskite.

**PL & Absorption Spectrum of Different Perovskite**

**
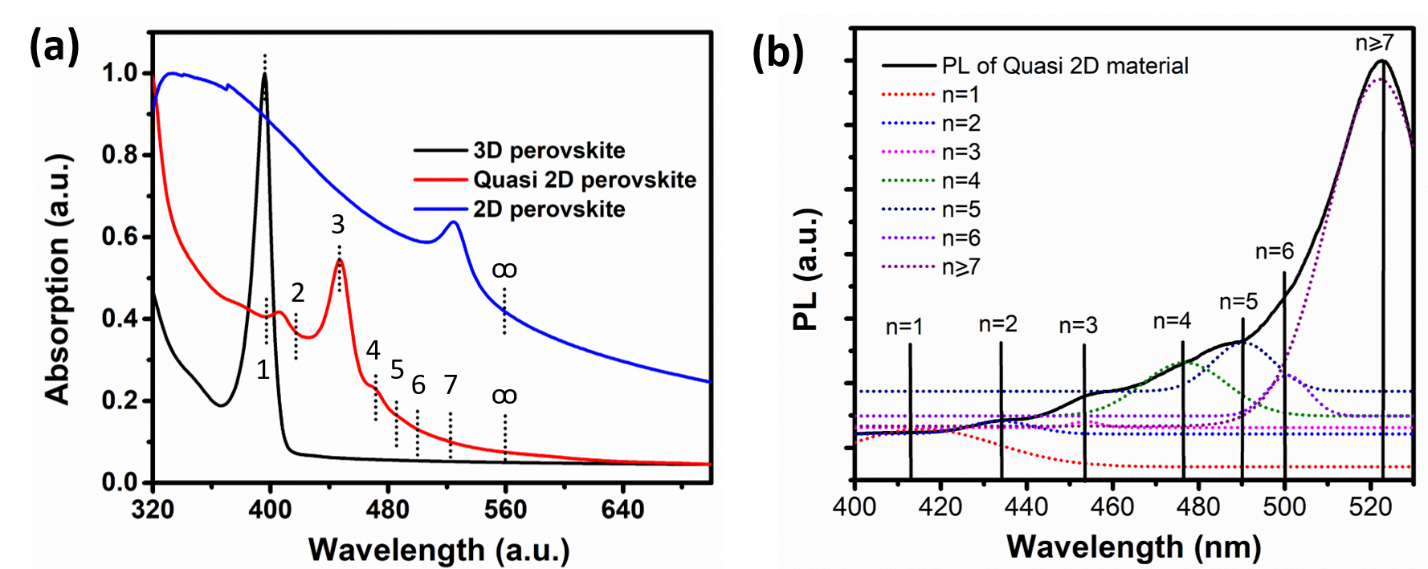
**

**Figure S3.** Absorption spectra of 2D, quasi 2D and 3D perovskite films. (b) Deconvoluted PL spectra of quasi 2D perovskite, the fitted peaks are listed in the **Table S1**.

**Table S1.** List of reported PL positions of quasi 2D perovskite microplate together with our results

| Unit cell layer number in perovskite | PL wavelength (nm) | | | | |
| --- | --- | --- | --- | --- | --- |
| Ref (1) | Ref (2) | Ref (3) | Ref (4) | Present work |
| 1 |  | 433 | 396 |  | 412 |
| 2 | 431 | 450 | 443 | 435 | 435 |
| 3 | 451 | 474 | 456 | 455 | 452 |
| 4 | 475 | 485 | 477 | 473 | 477 |
| 5 | 490 | 490 | 490 | 489 | 490 |
| 6 | 504 | 505 | -- | 505 | 501 |

**X-Ray Diffraction Study**


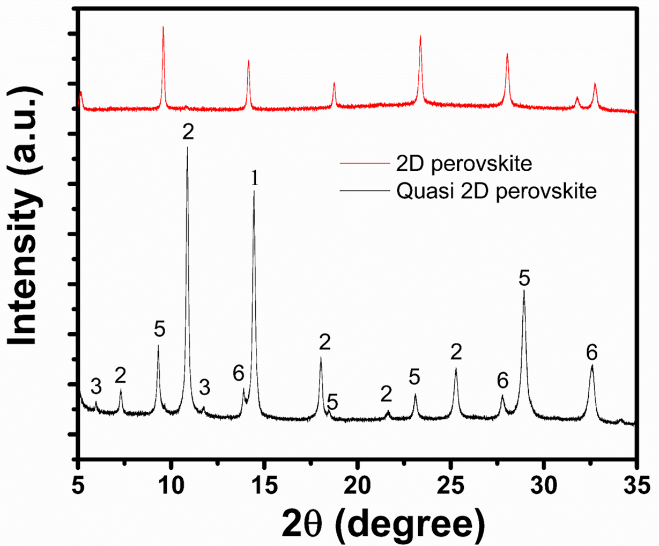


**Figure S4.** XRD pattern of 2D and quasi 2D perovskites.

XRD peak positions of (HA)2(MA)n-1PbnBr3n+1 RP perovskite are calculated from (00*l*) crystallographic planes. The estimated interlayer spacing is 21 Å +5.91 Å ×(n-1), where 5.91 Å is the thickness of each cubic phase lead bromide octahedron layer and 21 Å is the interlayer spacing of spacer cations based 2D perovskite (i.e., n=1) obtained from XRD data of 100% 2D spacer cation sample. The calculated result is consistent with published literature.5 In quasi 2D perovskite, 2-6 crystallographic planes are distinguished clearly, which are consistent with observed PL and absorption spectrum.

**UV Absorption and Photoelectron Emission Spectra**
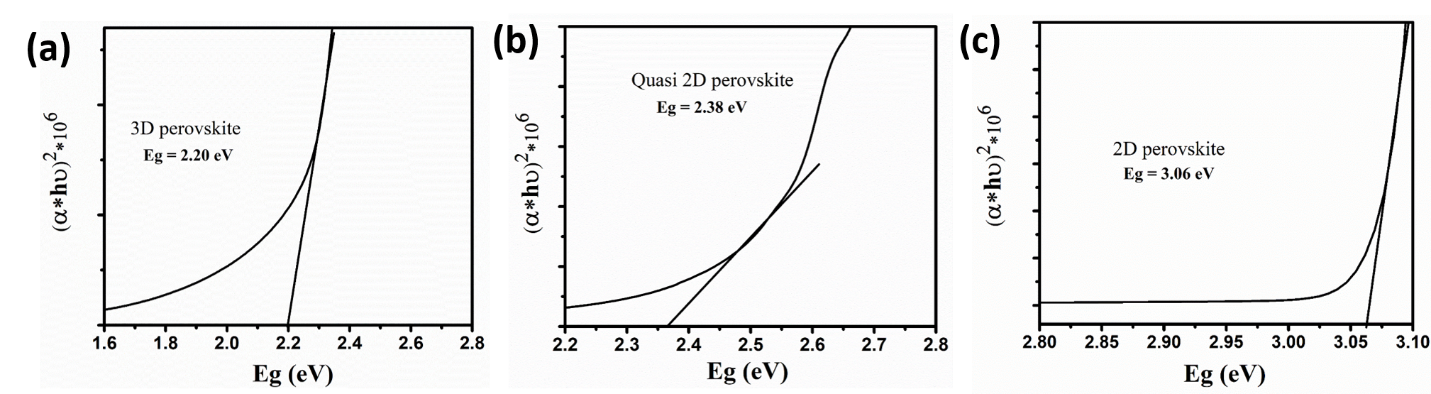


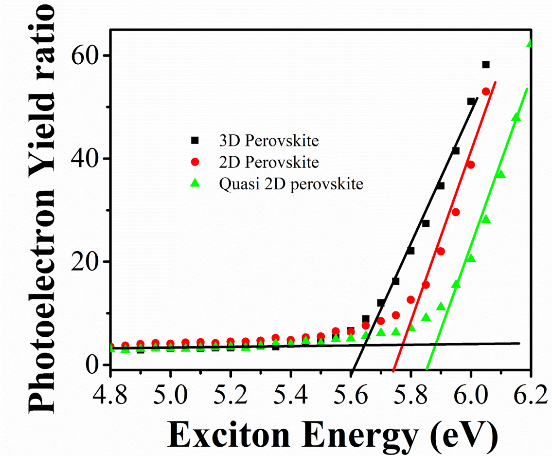


**Figure S5.** (a)-(c) Tauc plots of 2D, quasi 2D and 3D perovskite films. (d) Ultraviolet photoelectron emission spectra of films containing 2D, quasi 2D and 3D perovskites.

**Angle Dependent Random Laser**

**
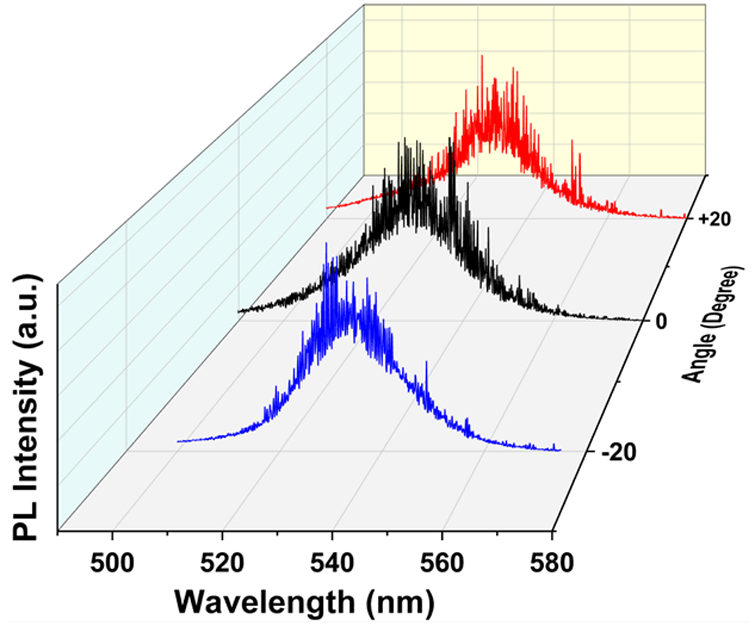
**

**Figure S6.**Angle-dependent random lasing spectra of quasi-2D RP perovskite.

**Emission and Absorption Spectrum of Quasi-2D Perovskite**

**Figure S7.** Spectral overlap between the emission and absorption spectrum of quasi-2D perovskite.

**Life-Time Measurement from TRPL**

**
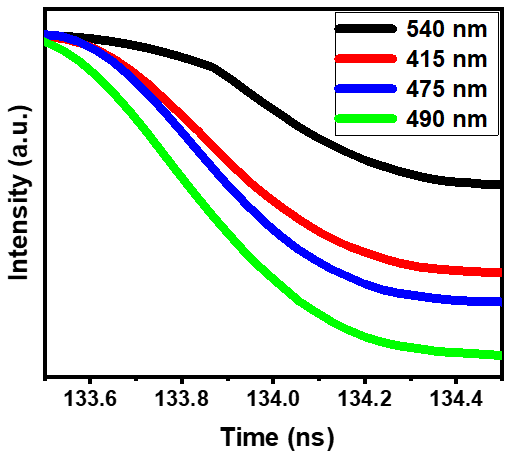
**

**Figure S8.** Exciton lifetime of quasi-2D RP perovskite at different wavelengthsfrom TRPL study.

**Injection Current Dependent Emitted Light Power**

**Figure S9.** Variation of Emitted Light Power with injection Currentdensity.

**FDTD Simulation for Light Extraction**


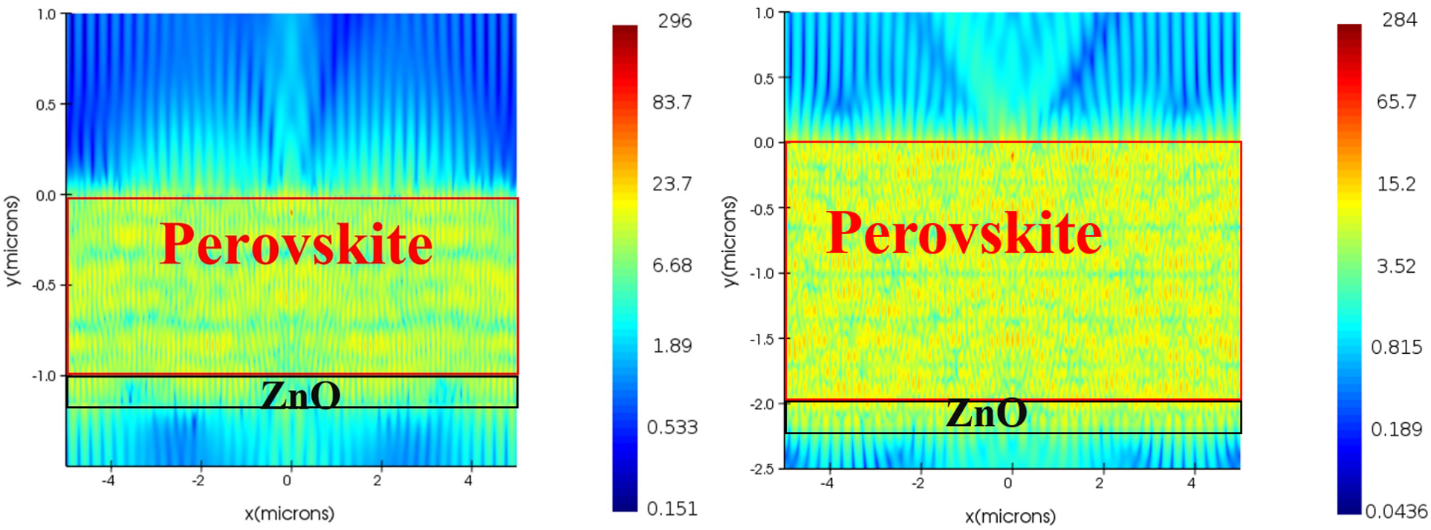


**Figure S10.** FDTD simulation of Light extraction from perovskite/ZnO heterostructure considering the perovskite thickness of 1 and 2 μm.

**External Quantum Efficiency & Device Stability**

**Figure S11.**The external quantum efficiency of green light emission from the device at different intervals of time.

**Device Fabrication**

**
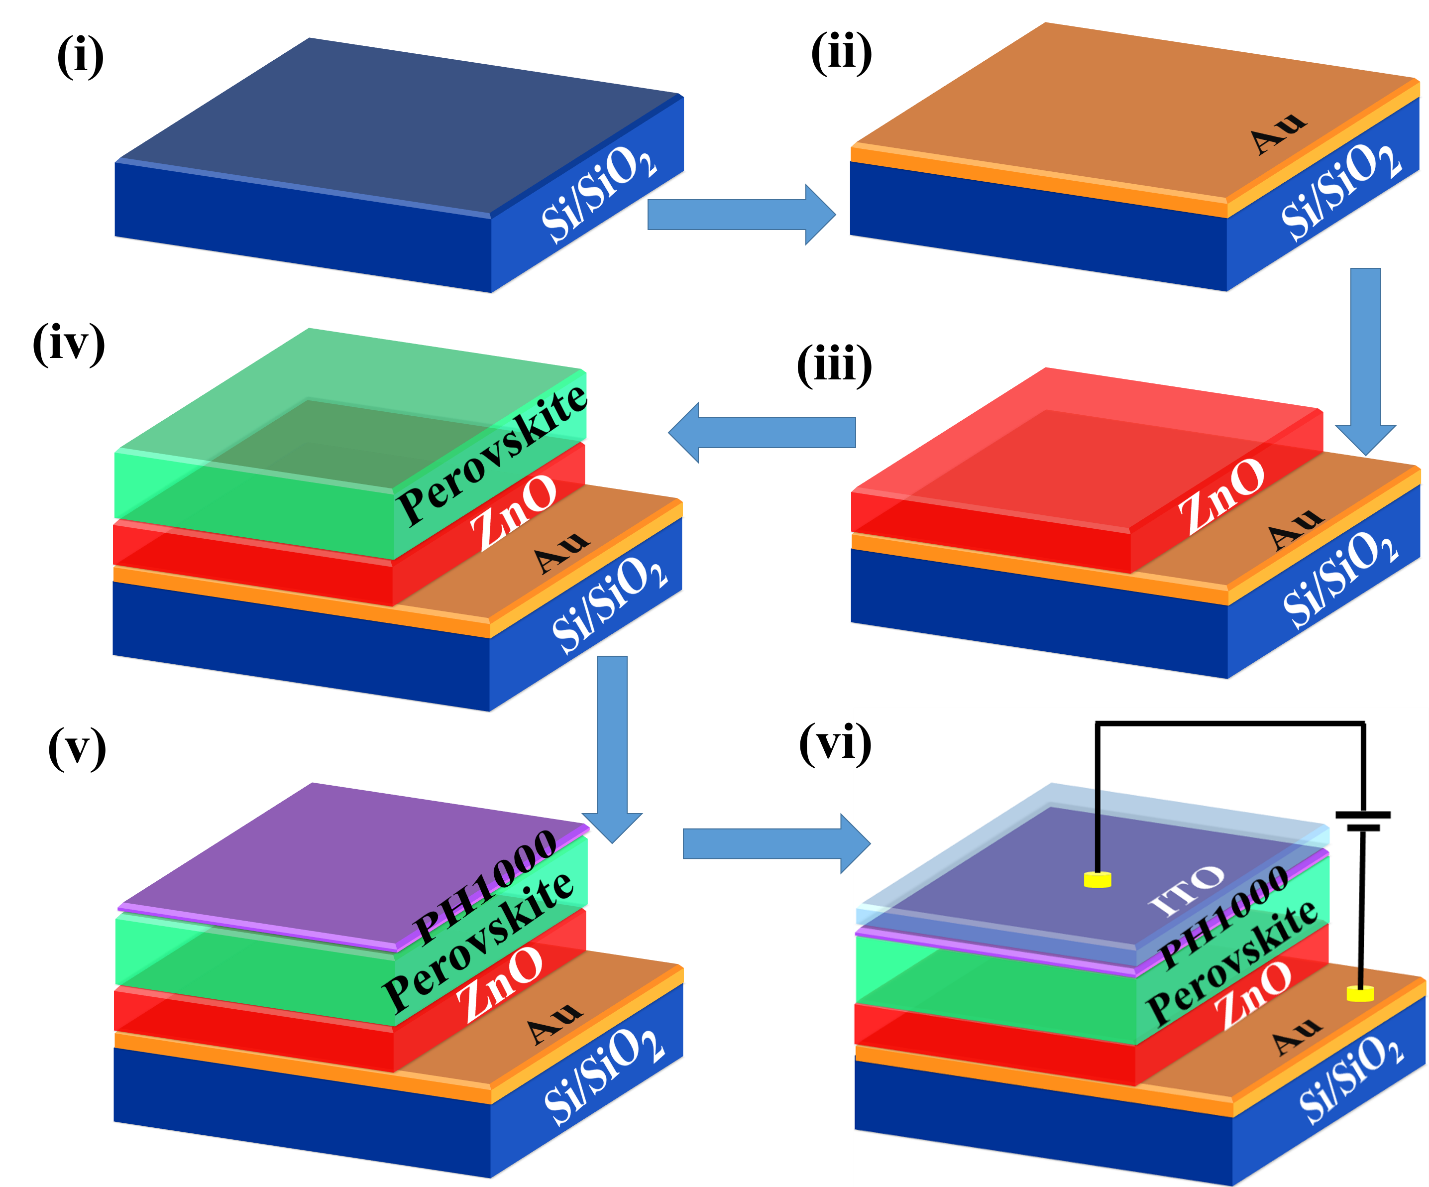
**

**Figure S12.**Different steps of light-emitting device fabrication.

**References**

1. Tyagi, P., Arveson, S.M. & Tisdale, W.A. Colloidal Organohalide Perovskite Nanoplatelets Exhibiting Quantum Confinement. *J. Phys. Chem. Let.* **6**, 1911-1916 (2015).

2. Cho, J., Choi, Y.-H., O’Loughlin, T.E., De Jesus, L. & Banerjee, S. Ligand-Mediated Modulation of Layer Thicknesses of Perovskite Methylammonium Lead Bromide Nanoplatelets. *Chem. Mater.* **28**, 6909-6916 (2016).

3. Wang, Q. et al. Quantum confinement effect and exciton binding energy of layered perovskite nanoplatelets. *AIP Adv.* **8**, 025108 (2018).

4. Li, M. et al. Enhanced Exciton and Photon Confinement in Ruddlesden–Popper Perovskite Microplatelets for Highly Stable Low-Threshold Polarized Lasing. *Adv. Mater.* **30**, 1707235 (2018).

5. Tabuchi, Y., Asai, K., Rikukawa, M., Sanui, K. & Ishigure, K. Preparation and characterization of natural lower dimensional layered perovskite-type compounds. *J. Phys. Chem. Solids* **61**, 837-845 (2000).
